# Supplementary material
Source: MDPI journal article supplement (https://www.mdpi.com/1424-2818/12/3/119)
Supplement: s1 [file s1]

**Table S1.** Total nest predators removed from Bashaw and Viking trapped sites, 2015–2017.

| Species                    | 2015       | 2016       |           | 2017       |            | Total      |
|----------------------------|------------|------------|-----------|------------|------------|------------|
|                            | Bashaw     | Bashaw     | Viking    | Bashaw     | Viking     |            |
| <b>Coyote</b>              | 14         | 64         | 33        | 35         | 16         | 162        |
| Franklin's Ground Squirrel | 0          | 0          | 0         | 0          | 11         | 11         |
| Red Fox                    | 0          | 0          | 1         | 3          | 0          | 4          |
| Raccoon                    | 1          | 0          | 1         | 0          | 1          | 3          |
| Skunk                      | 20         | 20         | 28        | 31         | 43         | 142        |
| Badger*                    | 4          | 1          | 0         | 0          | 0          | 5          |
| Raven                      | 18         | 95         | 5         | 54         | 32         | 204        |
| Magpie                     | 25         | 28         | 3         | 63         | 77         | 196        |
| Crow                       | 43         | 63         | 0         | 43         | 63         | 212        |
| Long-tailed weasel*        | 0          | 1          | 0         | 0          | 0          | 1          |
| <b>Total</b>               | <b>125</b> | <b>272</b> | <b>71</b> | <b>229</b> | <b>243</b> | <b>940</b> |
| *incidental                |            |            |           |            |            |            |

**Table S2.** Summary of wildlife trail cameras deployed at individual nests and predator species photographed.

| Study area & year                                 | N <sup>1</sup> | n <sup>2</sup> | Predator species                                             |
|---------------------------------------------------|----------------|----------------|--------------------------------------------------------------|
| Bashaw 2016                                       | 8              | 3              | Striped skunk, black-billed magpie                           |
|                                                   |                |                | American crow or common raven                                |
|                                                   |                |                | Striped skunk                                                |
|                                                   |                |                | Unidentified corvid                                          |
| Bashaw 2017                                       | 15             | 5              | Striped skunk, black-billed magpie                           |
|                                                   |                |                | Long-tailed weasel (post-hatch)                              |
|                                                   |                |                | Unidentified furbearer (possibly weasel)                     |
|                                                   |                |                | Long-tailed weasel                                           |
| Viking 2016                                       | 9              | 4              | Striped skunk, 13-lined ground squirrel, unidentified rodent |
|                                                   |                |                | 13-lined ground squirrel                                     |
|                                                   |                |                | Striped skunk                                                |
| Viking 2017                                       | 3              | 0              | Striped skunk, 13-lined ground squirrel                      |
|                                                   |                |                | N/A                                                          |
| <sup>1</sup> N = individual nests with cameras    |                |                |                                                              |
| <sup>2</sup> n = nests with predator photographed |                |                |                                                              |

**Table S3.** RMark nest survival models for daily survival rates of duck nests ( $n = 830$ ) on plots where predator removal was transposed over >2 years in central Alberta parklands in 2015–2017, ranked by corrected Akaike's Information Criterion (AICc).

| Model                             | K <sup>1</sup> | AICc <sup>2</sup> | ΔAICc <sup>3</sup> | w <sub>i</sub> <sup>4</sup> | Deviance |
|-----------------------------------|----------------|-------------------|--------------------|-----------------------------|----------|
| S(~-1 + treatment:StudyArea:year) | 10             | 2093.94           | 0.00               | 1.00                        | 2073.91  |
| S(~-1 + treatment:year)           | 6              | 2160.84           | 66.90              | 0.00                        | 2148.83  |
| S(~-1 + StudyArea:year)           | 5              | 2166.58           | 72.64              | 0.00                        | 2156.57  |
| S(~-1 + AgeDay1 + StudyArea:year) | 6              | 2168.15           | 74.21              | 0.00                        | 2156.14  |
| S(~year)                          | 3              | 2179.72           | 85.78              | 0.00                        | 2173.72  |
| S(~AgeDay1 + year)                | 4              | 2181.72           | 87.78              | 0.00                        | 2173.71  |
| S(~StudyArea)                     | 2              | 2186.03           | 92.09              | 0.00                        | 2182.03  |
| S(~treatment)                     | 2              | 2186.13           | 92.19              | 0.00                        | 2182.13  |
| S(~Time * Time)                   | 2              | 2193.44           | 99.49              | 0.00                        | 2189.43  |
| S(~Time)                          | 2              | 2193.44           | 99.49              | 0.00                        | 2189.43  |
| S(~AgeFound)                      | 2              | 2204.64           | 110.70             | 0.00                        | 2200.64  |
| S(~1)                             | 1              | 2204.96           | 111.02             | 0.00                        | 2202.96  |
| S(~AgeDay1)                       | 2              | 2206.76           | 112.82             | 0.00                        | 2202.76  |

<sup>1</sup>K = number of model parameters

<sup>2</sup>AICc = Akaike information criterion corrected for small sample sizes

<sup>3</sup>ΔAICc = difference in AIC value from top model

<sup>4</sup>w<sub>i</sub> = model weight

**Table S4.** Daily survival rate (DSR) and standard error (SE) derived from top-performing RMark nest survival model for daily survival rates of duck nests on plots where predator removal was transposed over >2 years in central Alberta parklands in 2015–2017.

| Study Area/Year/Treatment              | DSR <sup>1</sup> | SE <sup>2</sup> |
|----------------------------------------|------------------|-----------------|
| Bashaw 2015 Control                    | 0.9623486        | 0.0080840       |
| Bashaw 2016 Control                    | 0.9640390        | 0.0077220       |
| Viking 2016 Control                    | 0.9471145        | 0.0077928       |
| Bashaw 2017 Control                    | 0.9487335        | 0.0052604       |
| Viking 2017 Control                    | 0.8527007        | 0.0121859       |
| Bashaw 2015 Trapped                    | 0.9639663        | 0.0065871       |
| Bashaw 2016 Trapped                    | 0.9530781        | 0.0056207       |
| Viking 2016 Trapped                    | 0.9492815        | 0.0059268       |
| Bashaw 2017 Trapped                    | 0.9318947        | 0.0130123       |
| Viking 2017 Trapped                    | 0.9653167        | 0.0056134       |
| <sup>1</sup> DSR = daily survival rate |                  |                 |
| <sup>2</sup> SE = standard error       |                  |                 |

**Table S5.** RMark nest survival models for daily survival rates of duck nests on plots where predator removal was transposed over >2 years in central Alberta parklands in 2015–2017, excluding Viking Control 2017 plots. Ranked by corrected Akaike's Information Criterion (AICc),.

| Model                                                                             | K <sup>1</sup> | AICc <sup>2</sup> | ΔAICc <sup>3</sup> | w <sub>i</sub> <sup>4</sup> | Deviance | Beta Value |
|-----------------------------------------------------------------------------------|----------------|-------------------|--------------------|-----------------------------|----------|------------|
| S(~-1 + StudyArea:year)                                                           | 5              | 1803.43           | 0                  | 0.26                        | 1793.42  | +          |
| S(~AgeFound)                                                                      | 2              | 1803.79           | 0.36               | 0.22                        | 1799.79  | +          |
| S(~Time * Time)                                                                   | 2              | 1805.20           | 1.77               | 0.11                        | 1801.20  | -/+        |
| S(~Time)                                                                          | 2              | 1805.20           | 1.77               | 0.11                        | 1801.20  | -/+        |
| S(~-1 + AgeDay1 + StudyArea:year)                                                 | 6              | 1805.43           | 2.00               | 0.10                        | 1793.42  | -/+        |
| S(~1)                                                                             | 1              | 1806.50           | 3.07               | 0.06                        | 1804.50  |            |
| S(~year)                                                                          | 3              | 1807.11           | 3.68               | 0.04                        | 1801.11  |            |
| S(~treatment)                                                                     | 2              | 1808.32           | 4.88               | 0.02                        | 1804.31  |            |
| S(~AgeDay1)                                                                       | 2              | 1808.39           | 4.95               | 0.02                        | 1804.38  |            |
| S(~StudyArea)                                                                     | 2              | 1808.51           | 5.07               | 0.02                        | 1804.50  |            |
| S(~-1 + treatment:StudyArea:year)                                                 | 9              | 1808.53           | 5.10               | 0.02                        | 1790.51  |            |
| S(~AgeDay1 + year)                                                                | 4              | 1808.96           | 5.52               | 0.02                        | 1801.00  |            |
| S(~-1 + treatment:year)                                                           | 6              | 1811.85           | 8.42               | 0.00                        | 1799.84  |            |
| <sup>1</sup> K = number of model parameters                                       |                |                   |                    |                             |          |            |
| <sup>2</sup> AICc = Akaike information criterion corrected for small sample sizes |                |                   |                    |                             |          |            |
| <sup>3</sup> ΔAICc = difference in AIC value from top model                       |                |                   |                    |                             |          |            |
| <sup>4</sup> w <sub>i</sub> = model weight                                        |                |                   |                    |                             |          |            |

**Table S6.** Counts of depredated nesting hens (*n* = 27) by species and treatment plot on which they were found.

| Species                    | Control | Predator Removal |
|----------------------------|---------|------------------|
| American green-winged teal | 1       | 0                |
| American widgeon           | 0       | 1                |
| Blue-winged teal           | 3       | 10               |
| Gadwall                    | 3       | 1                |
| Northern shoveler          | 2       | 6                |
